# Supplementary material
Source: Springer Nature journal article supplement (https://www.springermedizin.de/resource/supplementary/12936_2011_1863_MOESM1_ESM.pdf/9541942)

Parasite density (/μL )

# The parasite clearance curve

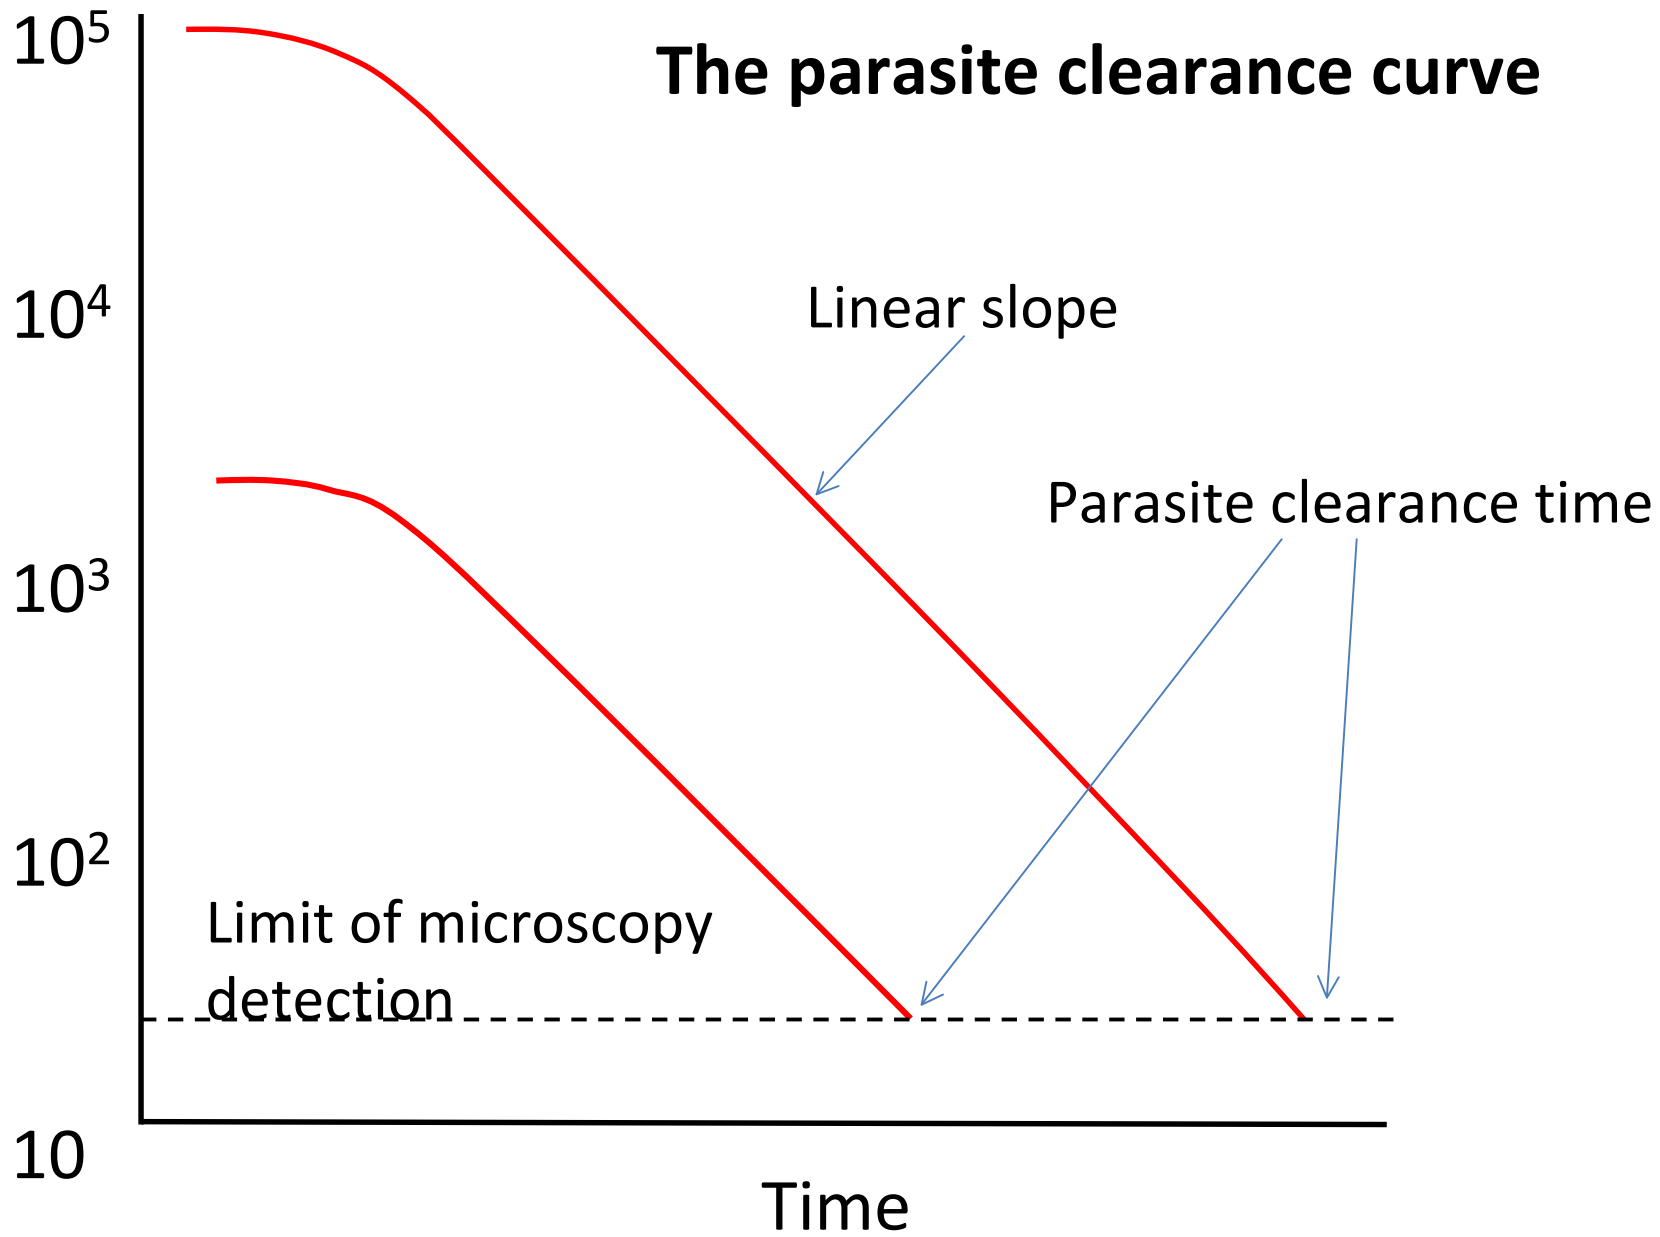

Supplement: MOESM1 [file 9541942]
